# Supplementary material for: Porous metal electrodes enable efficient electrolysis of carbon capture solutions
Source: Royal Society of Chemistry journal article supplement (doi:10.1039/d1ee02608a), 2022-01-01
Supplement: d1ee02608a1.pdf [file d1ee02608a1.pdf]

**Supporting Information for**

# **Porous metal electrodes enable efficient electrolysis of carbon capture solutions**

Zishuai Zhang,<sup>1#</sup> Eric W. Lees,<sup>2#</sup> Faezeh Habibzadeh,<sup>1</sup> Danielle A. Salvatore,<sup>2</sup> Shaoxuan Ren,<sup>1</sup> Grace Simpson,<sup>2</sup> Danika Wheeler,<sup>2</sup> Alyssa Liu,<sup>1</sup> and Curtis P. Berlinguette\*<sup>1,2,3,4</sup>

<sup>1</sup>Department of Chemistry, The University of British Columbia, 2036 Main Mall, Vancouver, British Columbia, V6T 1Z1, Canada.

<sup>2</sup>Department of Chemical and Biological Engineering, The University of British Columbia, 2360 East Mall, Vancouver, British Columbia, V6T 1Z3, Canada.

<sup>3</sup>Stewart Blusson Quantum Matter Institute, The University of British Columbia, 2355 East Mall, Vancouver, British Columbia, V6T 1Z4, Canada.

<sup>4</sup>Canadian Institute for Advanced Research (CIFAR), 661 University Avenue, Toronto, M5G 1M1, Ontario, Canada.

<sup>#</sup> These authors contributed to this work equally

\*Corresponding author: Curtis P. Berlinguette ([cberling@chem.ubc.ca](mailto:cberling@chem.ubc.ca))

## Experimental procedures

### Methods and Materials

$\text{KHCO}_3$  (99.5%, Alfa Aesar, USA), silver nanopowder (~100 nm, 99%, Sigma Aldrich, USA) and ethylenediaminetetraacetic acid, EDTA (99%, Sigma Aldrich, USA) were purchased and used as received. Carbon cloth gas diffusion layers (CeTech<sup>®</sup> with microporous layer) and Fumasep FBM bipolar membranes were purchased from Fuel Cell Store (USA). The membrane was stored in 1 M NaCl prior to use. Silver foams were obtained from Jiangsu Green Materials Hi-Tech. Co. Ltd. (China). Nickel foams (>99.99%) were purchased from MTI Corporation (USA) and Nafion<sup>®</sup> 117 solutions (5 wt%; in a mixture of lower aliphatic alcohols and water) were obtained from Sigma Aldrich, USA. Nitric acid (70 wt%, Fisher Scientific, USA) was used to make 30% v/v etching solutions.

A CH instrument 660D potentiostat (USA) equipped with an Amp booster was used for all electrolysis experiments. A Ag/AgCl (3 M NaCl) reference electrode (BASi<sup>®</sup>) was used for electrochemical surface area measurement. A gas chromatography instrument (GC, Perkin Elmer, Clarus 580), equipped with a packed MolSieve 5 Å column and a packed HayeSepD column was used to detect CO and H<sub>2</sub> using a flame ionization detector (FID) and a thermal conductivity detector (TCD), respectively. Argon (99.999%, Praxair Canada Inc.) was the carrier gas. The concentrations of the products CO and H<sub>2</sub> (ppm) in the headspace of the catholyte reservoir were quantified using previously constructed calibration lines for CO and H<sub>2</sub>. The spray-coater (Power Fist, China) equipped with a 0.22 mm nozzle and 2 ml paint cup was used for deposition of catalyst inks on the gas diffusion layers.

Scanning electron microscopy (SEM) was performed using a FEI Helios NanoLab 650 dual beam scanning electron microscope with an accelerating voltage of 5.0 keV and a beam current of 50 pA. The X-ray diffraction (XRD) data were obtained with a Bruker D8 Advance diffractometer using Cu K-alpha radiation. Data was collected between 2θ angles of 20° to 80° at a rate of 6° per minute.

## Cathode Preparation

The silver foam and nickel foam were cut into desired dimensions ( $2 \times 2$  cm) with a blade and washed with acetone and water. The silver foam was treated with dilute nitric acid solution (30% v/v  $\text{HNO}_3$ ) in a 50 ml beaker for 10 s to remove the oxide layer and increase its electrochemical surface area. The etched silver foam was further washed thoroughly with deionized (DI) water, followed by a rinse with 3.0 M  $\text{KHCO}_3$ . The prepared electrode was stored in DI water for further use.

To fabricate carbon composite electrodes, a catalyst ink was prepared by mixing 315 mg silver nanoparticles, 15 ml DI water, 15 ml IPA and 420  $\mu\text{l}$  Nafion<sup>®</sup> 117 solution. The catalyst ink was then spray-coated on the carbon cloth to make multiple electrodes (geometric area:  $4 \text{ cm}^2$ ) with silver loadings of  $3.7 \pm 0.1 \text{ mg cm}^{-2}$ .

## Electrolyte Preparation

3 M fresh  $\text{KHCO}_3$  solution was prepared before each test in a 500-ml volumetric flask. Prior to use in the flow electrolyser, EDTA was added to the stock solution at a concentration of 0.02 M to prevent electrolyte impurities from electrodeposition on the cathode surface.<sup>1</sup>

## Electrochemical surface area (ECSA) measurements:

Cyclic voltammetry (CV) of the carbon composite electrode and foam electrode was performed from -0.6 V to -0.4 V (vs. Ag/AgCl) in 3 M  $\text{KHCO}_3$  solution at different scan rates ranging from 10 to 100  $\text{mV s}^{-1}$ . All electrodes had a geometric area of  $1 \text{ cm}^2$ . ECSA of silver was calculated as  $C_{\text{dl}}/C_s$ , where  $C_{\text{dl}}$  represents double layer capacitance and  $C_s$  represents the standard capacitance of a smooth planar surface silver in an aqueous electrolyte.<sup>2,3</sup> Values of  $C_{\text{dl}}$  were calculated based on the following equation:  $i = \nu C_{\text{dl}}$ , and the current densities were obtained at -0.5 V vs Ag/AgCl.<sup>4</sup> We plotted the current density ( $i$ ) as a function of scan rates ( $\nu$ ), and then the slope represents  $C_{\text{dl}}$ .  $C_s$  was considered constant for all silver electrodes. Therefore, the measured  $C_{\text{dl}}$  values are directly proportional to the ECSA. Note that, the  $C_{\text{dl}}$

measurement for the carbon composite electrode may include contributions from the gas diffusion layer, however, with the potential extra  $C_{dl}$  measured, the calculated silver ECSA of the carbon composite electrode is still significantly lower. Results are shown in Figure S3.

### Faradaic Efficiency Calculation

We measured the CO selectivity at constant current densities by quantifying the  $H_2$  and CO concentrations (for calculating mole fraction of CO in the gaseous mixture analyzed,  $\chi$ ) through GC.

The FE of a gaseous product k was determined in accordance with Eq. S1.<sup>5</sup>

$$FE = n_k F \chi_k F_m / I \quad \text{Eq. S1}$$

Where  $n_k$  is the number of electrons exchanged,  $F$  is Faraday's constant ( $F = 96,485 \text{ C/mol}$ ),  $F_m$  is the molar flow rate in mol/s, and  $I$  is the total current in A. The molar flow rate is derived from the volume flow rate  $F_v$  by the relation  $F_m = pF_v/RT$ , with  $p$  being the atmospheric pressure in Pa,  $R$  the ideal gas constant of  $8.314 \text{ J/mol K}$  and  $T$  the temperature in K.

### CO<sub>2</sub> utilization Calculation

CO<sub>2</sub> utilization was calculated in accordance with Eq. S2. This quantity represents the conversion of *in-situ* generated CO<sub>2</sub> into CO, and therefore, the extent to which the CO is diluted with unreacted CO<sub>2</sub>.

$$CO_2 \text{ utilization} = [CO]/([CO] + [CO_2]) \times 100\% \quad \text{Eq. S2}$$

Where  $[CO]$  and  $[CO_2]$  outlets represent the concentrations of CO and CO<sub>2</sub>, respectively, as measured by GC analyses.

## Energy Efficiency Calculation

The cathodic cell energy efficiency for CO ( $EE_{CO}$ ) is calculated according to the Eq. S3<sup>6</sup>

$$EE_{CO} = (E_{CO}/\text{full cell potential}) \times FE_{CO} \quad \text{Eq. S3}$$

## Liquid Product Detection

We used  $^1\text{H}$  NMR spectroscopy to identify the concentrations of formate after 60 min of electrolysis at 20 °C and after 30 min electrolysis at 70 °C. After the electrolysis using the etched foam electrodes, A 500  $\mu\text{L}$  aliquot of the circulated catholyte was transferred to an NMR tube and was mixed with benzene-1,3,5-tricarboxylic acid with known concentrations (10, 50, 100, 500 mM) as the internal standard. A mixture of 100  $\mu\text{L}$  deuterium oxide ( $\text{D}_2\text{O}$ ) and 400  $\mu\text{L}$  DI  $\text{H}_2\text{O}$  was added to the contents of the tube. The  $^1\text{H}$  NMR spectra were collected using a 400 MHz spectrometer (Bruker AV400sp) at RT. Water signal was suppressed using Watergate W5 pulse sequence with double gradient echos.<sup>7</sup> A series of standard solutions with known concentrations of formate were prepared and analyzed by  $^1\text{H}$  NMR, and a calibration curve was created by plotting the relative signal areas versus concentration of formate. Using this method, we determined the concentration of formate in the catholyte solution and used those values to calculate  $FE_{\text{formate}}$ . We found out that the formate faradaic efficiencies in both cases were lower than 1%.

## Controlled Temperature Experiments

The temperature of the catholyte reservoir was controlled with a water bath set to 20, 40, 60, or 80 °C. The electrolyser inlet temperatures were measured using in-line resistance temperature detectors (RTDs). The catholyte reservoir was placed in a water bath with increased temperatures ( $T_{\text{bath}}$ ) and was

allowed to reach thermal equilibrium before electrolysis. The temperature of the catholyte entering the flow cell was measured at the inlet of the cathode flow plate ( $T_{\text{inlet}}$ ) to account for heat losses during the transfer of liquid from the reservoir to the flow cell.

### Pressurized electrolyser Test Station

A sealed vessel with a volume of 1 gallon was designed to feed high pressure bicarbonate solution into the bicarbonate electrolyser (Figure S8). This vessel had 4 ports which were connected to tubing that carried the liquid inlet, liquid outlet, gas inlet, and gas outlet flows. The electrolyte reservoir was filled with 500 mL of 3.0 M  $\text{KHCO}_3$  solution and was pressurized by supplying  $\text{N}_2$  gas to the gas inlet of the vessel while constricting the outlet gas flow using a pressure regulating valve. The gas flow rate was controlled using a mass flow controller positioned upstream of the reservoir. A pressure relief valve was used to prevent overpressurizing the GC. The pressurized liquid electrolyte was pumped to the electrolyser and continuously recycled to the vessel. Digital pressure indicators positioned at the inlet and outlet of the electrolyser were used to measure the system pressure and pressure drop across the cathode compartment. Gas chromatography measurements were taken after 15 minutes of electrolysis. No liquid products were detected by  $^1\text{H}$  NMR. Therefore, the  $\text{FE}_{\text{CO}}$  and  $\text{FE}_{\text{H}_2}$  were normalized to 100% for every experiment. These normalized FE values obtained at 1 atm with our pressurized bicarbonate electrolyser test station matched that of the experiments performed at ambient conditions, which confirms that the normalized values are accurate.

An increase in bicarbonate feedstock pressure,  $p$ , decreases the rate of  $\text{CO}_2$  mass transfer from the electrolyte into the gas phase,  $R_{\text{MT},\text{CO}_2}$  (Eq. S4).<sup>8</sup>

$$R_{\text{MT},\text{CO}_2} = k_{\text{GL},\text{CO}_2} M_{\text{CO}_2} \left( c_{\text{CO}_2(\text{aq})} - H_{\text{CO}_2} p y_{\text{CO}_2} \right) \quad \text{Eq. S4}$$

Where  $H_{CO_2}$  is the Henry's constant for  $CO_2$ ,  $y_{CO_2}$  is the mass fraction of  $CO_2$  in the gas bubbles, and  $c_{CO_2(aq)}$  is the  $CO_2$  concentration in the electrolyte. The gas-to-liquid mass-transfer coefficient of  $CO_2$ ,  $k_{GL,CO_2}$ , is given by Eq. S5:

$$k_{GL,CO_2} = \frac{D_{CO_2(aq)}}{\delta_{TF}} \quad \text{Eq. S5}$$

where  $D_{CO_2(aq)}$  is the diffusion coefficient of  $CO_2$  in the liquid electrolyte, and  $\delta_{TF}$  is the thickness of the thin film of electrolyte on the surface of the electrode.<sup>8</sup>

### Bicarbonate equilibrium

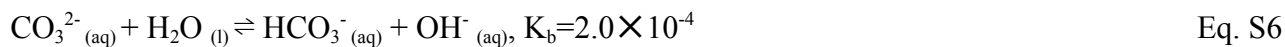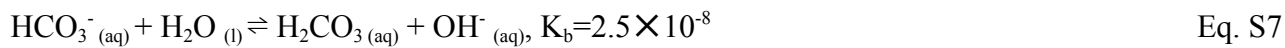

**Table S1.** The Reported State-of-Art Catalyst Performance for  $CO_2$  Reduction.

| Cathode Catalyst             | FE <sub>CO</sub><br>(%)          | Potential (V)             | Cell type;<br>Cathode feedstock                                                           | Reference |
|------------------------------|----------------------------------|---------------------------|-------------------------------------------------------------------------------------------|-----------|
| <b>Silver foam electrode</b> | 95% at 100 mA cm <sup>-2</sup> ; | 3.6                       | “zero-gap” cell;<br>liquid -fed (3 M KHCO <sub>3</sub> )                                  | This work |
| Silver composite electrode   | 82% at 100 mA cm <sup>-2</sup>   | 3.4                       | “zero-gap” cell;<br>liquid -fed (3 M KHCO <sub>3</sub> )                                  | 9         |
| Silver composite electrode   | 98% at 100 mA cm <sup>-2</sup>   | 3.0                       | “zero-gap” cell;<br>gas -fed (CO <sub>2</sub> )                                           | 10        |
| Silver composite electrode   | 60% at 50 mA cm <sup>-2</sup>    | -1.5 vs Ag/AgCl (cathode) | “zero-gap” cell;<br>liquid -fed (0.5 M KHCO <sub>3</sub> saturated with CO <sub>2</sub> ) | 11        |
| CoPc composite               | 98% at 150 mA                    | 2.8                       | “zero-gap” cell;                                                                          | 12        |

| electrode                     | cm <sup>-2</sup>                                                     |         | gas -fed (CO <sub>2</sub> )                                                                                  |    |
|-------------------------------|----------------------------------------------------------------------|---------|--------------------------------------------------------------------------------------------------------------|----|
| MWNT/PyPBI/Au                 | 98.3% at ~100 mA<br>cm <sup>-2</sup>                                 | 2.5     | microfluidic cell;<br>gas -fed (CO <sub>2</sub> )                                                            | 13 |
| Silver composite<br>electrode | 18% at 104 mA<br>cm <sup>-2</sup>                                    | 4.5-5.5 | microfluidic cell;<br>liquid -fed (1.25<br>M KHCO <sub>3</sub> )                                             | 14 |
| Silver composite<br>electrode | 95% at 225 mA<br>cm <sup>-2</sup> (18.5 atm)                         | 3.7     | “zero-gap” cell;<br>liquid -fed (0.5 M<br>K <sub>2</sub> SO <sub>4</sub> saturated<br>with CO <sub>2</sub> ) | 15 |
| Unsupported Ag<br>particles   | 82% at 20 mA cm <sup>-2</sup>                                        | 2.9     | microfluidic cell;<br>liquid -fed (0.5 M<br>KHCO <sub>3</sub> saturated<br>with CO <sub>2</sub> )            | 16 |
| Silver composite<br>electrode | 81% at 25 mA cm <sup>-2</sup> ;<br>33% at 100 mA<br>cm <sup>-2</sup> | 3.4     | “zero-gap” cell;<br>liquid -fed (3 M<br>KHCO <sub>3</sub> )                                                  | 17 |

**Table S2.** Cathodic energy efficiency for CO (EE<sub>CO</sub>) for the electrolyser operated at 4 and 1 atm with the silver foam electrode.

|                      | electrolyser operated at 4 atm | electrolyser operated at 1 atm |
|----------------------|--------------------------------|--------------------------------|
| FE <sub>CO</sub> (%) | 95                             | 60                             |
| Voltage (V)          | 3.7                            | 3.7                            |
| EE <sub>CO</sub>     | 34%                            | 22%                            |

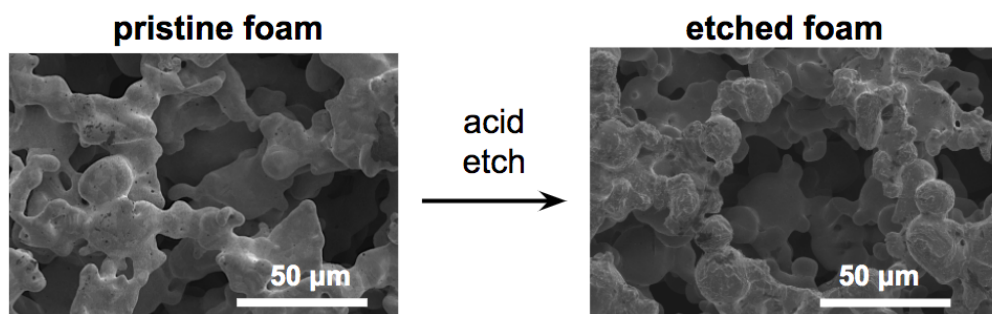

**Figure S1.** SEM images of the pristine foam and etched foam electrodes under investigation in this work.

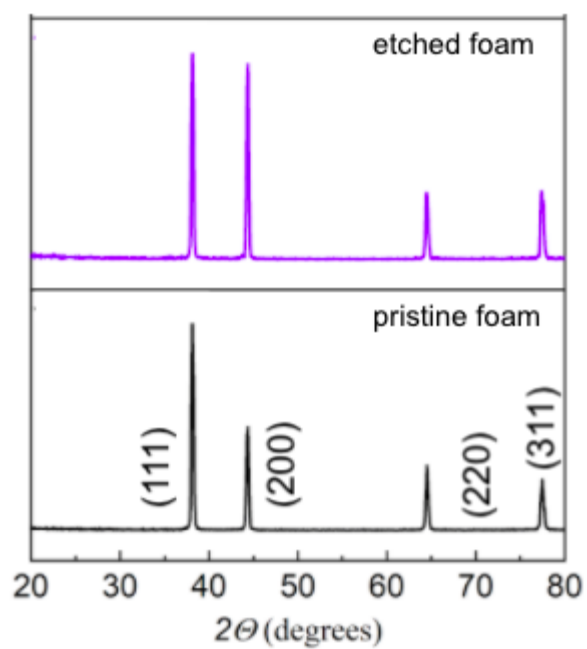

**Figure S2.** XRD patterns for the pristine foam and etched foam cathodes show no oxide layers were formed during the etching process.<sup>18</sup>

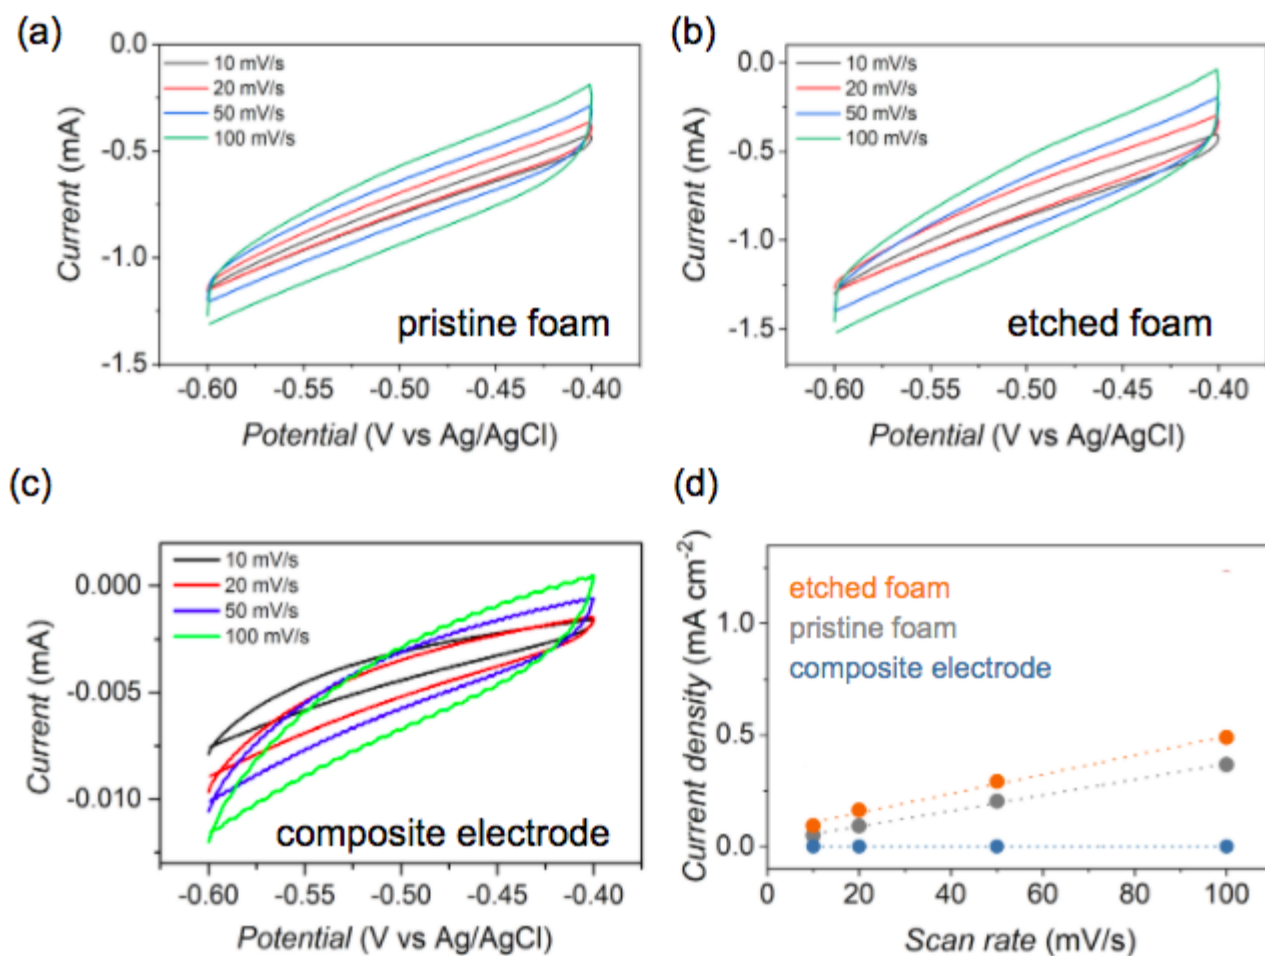

**Figure S3.** Double layer capacitance measurements used for the determination of the relative electrochemical surface area (ECSA) in non-faradaic regions. (a) Cyclic voltammetry recorded for pristine foam, (b) etched foam and (c) carbon composite electrodes from -0.6 V to -0.4 V (vs. Ag/AgCl). All electrodes had identical geometric surface area of 1 cm<sup>2</sup>. We used the current density at -0.50 V (vs. Ag/AgCl) to plot in (d).

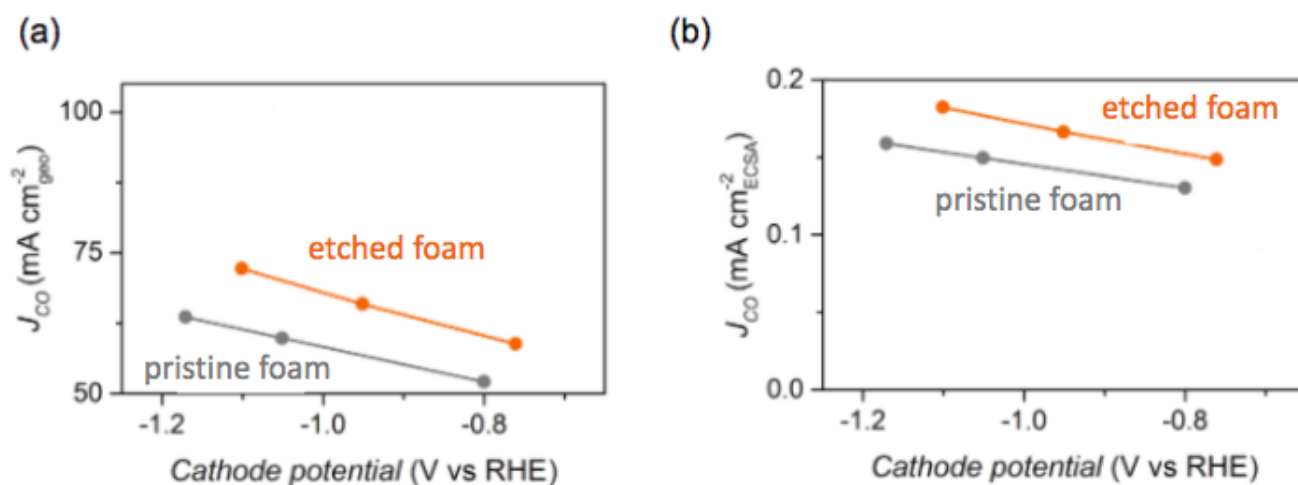

**Figure S4.** CO partial current density based on the geometric surface area (a) and ECSA (b) with the relationship of the applied cathode potential (RHE scale) for pristine foam and etched foam electrodes.

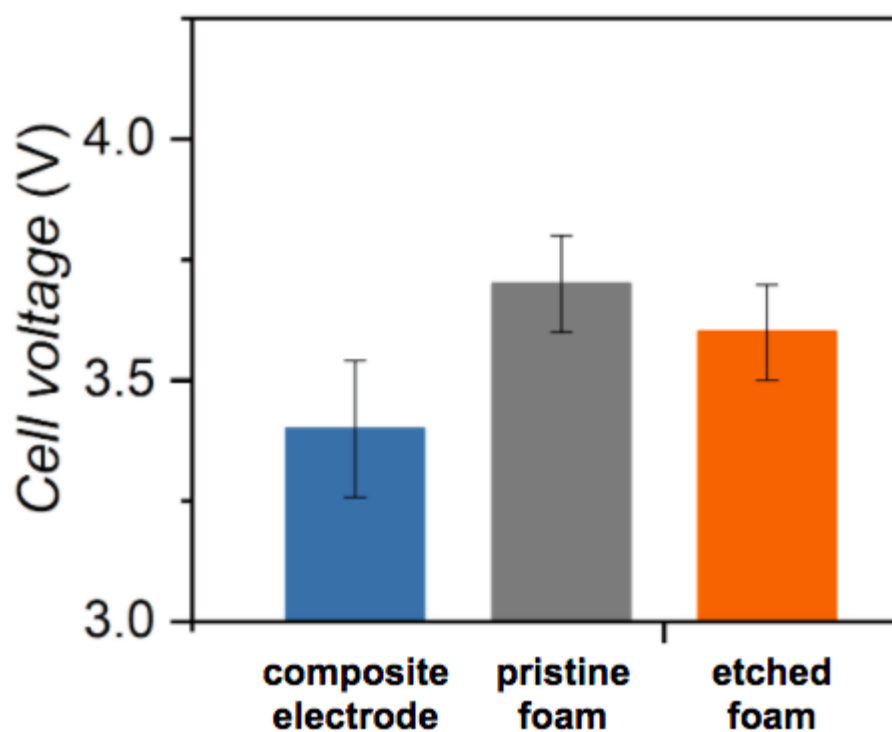

**Figure S5.** Cell voltages ( $V_{cell}$ ) obtained with tested cathodes when operating at 100 mA cm<sup>-2</sup>. Three samples for each cathode were tested, and the data was collected at  $t=500$  s of electrolysis. The uncertainty is the standard deviation of 3 independent measurements.

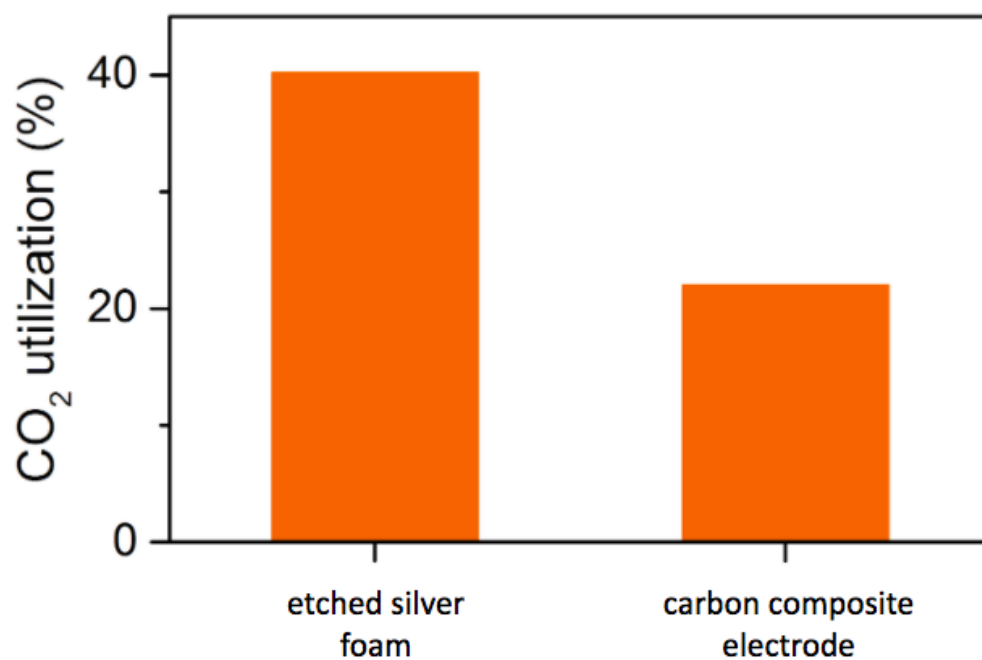

**Figure S6.** CO<sub>2</sub> utilization values for electrolyzers containing etched silver foam and carbon composite electrodes at 100 mA cm<sup>-2</sup>.

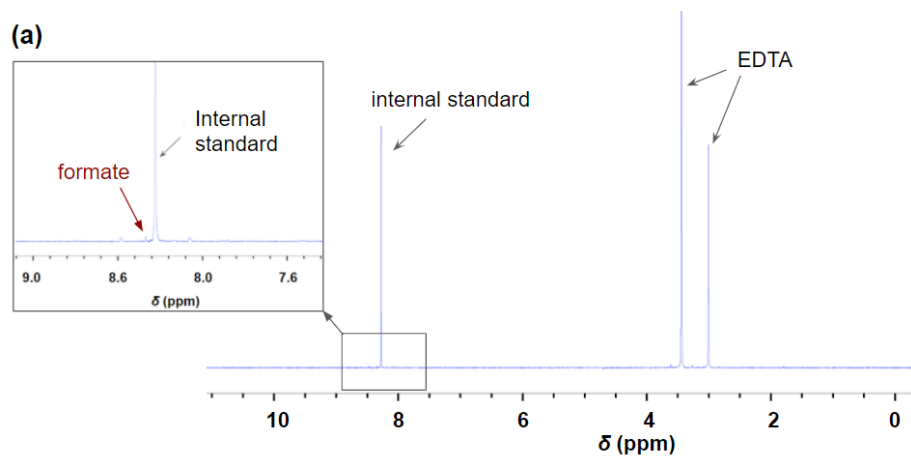

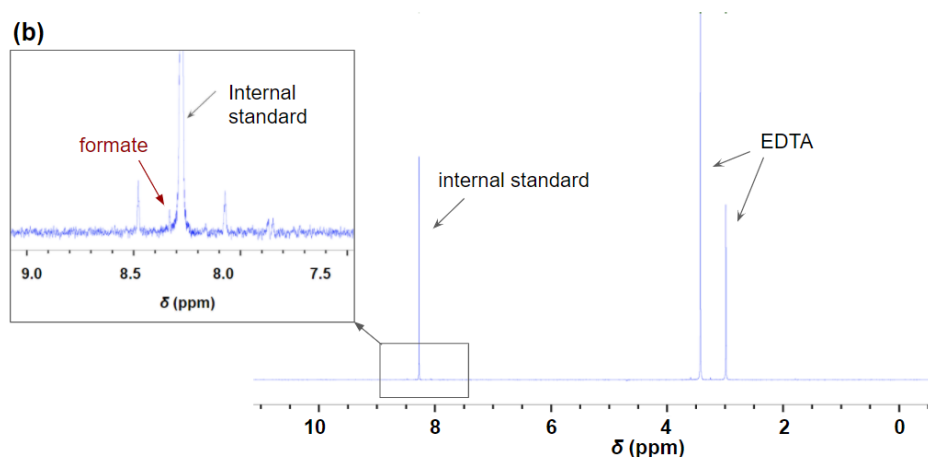

**Figure S7:**  $^1\text{H}$  NMR spectra for electrolysis (at  $100\text{ mA cm}^{-2}$ ) using silver foam electrodes after a) 60 mins at room temperature, and b) 30 mins at  $70^\circ\text{C}$ . The insets show the area where the formate appears.

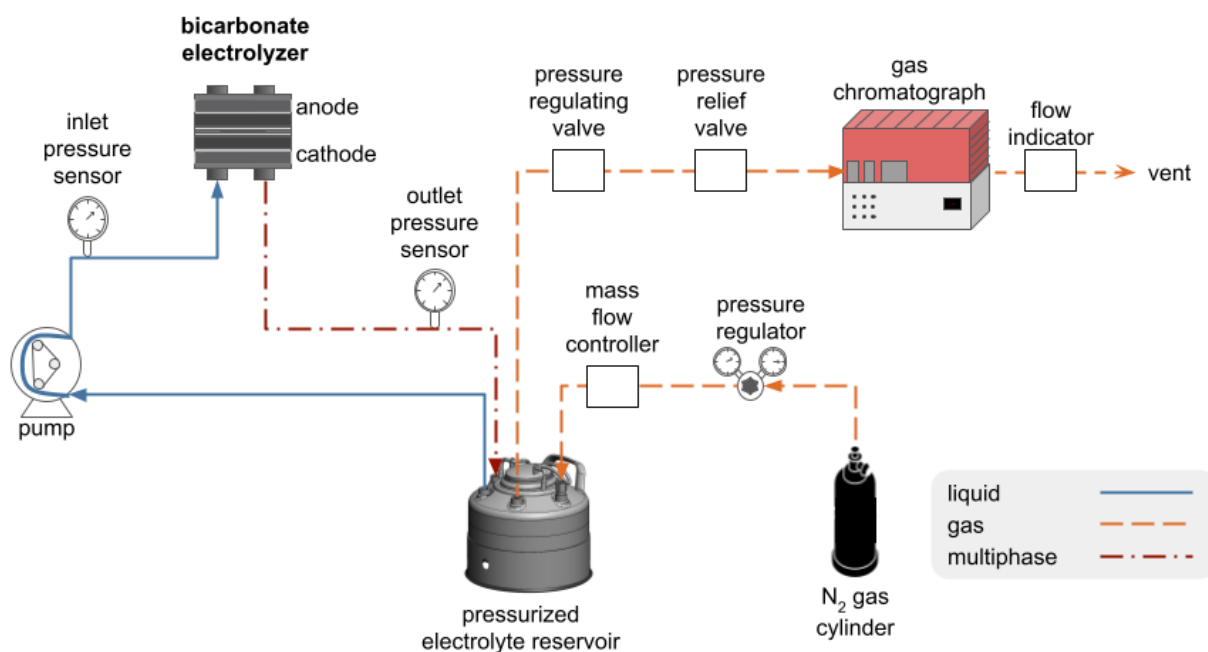

**Figure S8.** Schematic depiction of the pressurized bicarbonate electrolyser system.  $\text{N}_2$  gas was used to control the pressure of the system, and the pressure value of the liquid feedstock was measured at the inlet of the electrolyser by a pressure sensor. The flow rate of gas was controlled using a mass flow controller and the pressure was controlled using a pressure regulating valve. The final products were measured by a gas chromatography. No liquid  $\text{CO}_2\text{RR}$  product was detected.

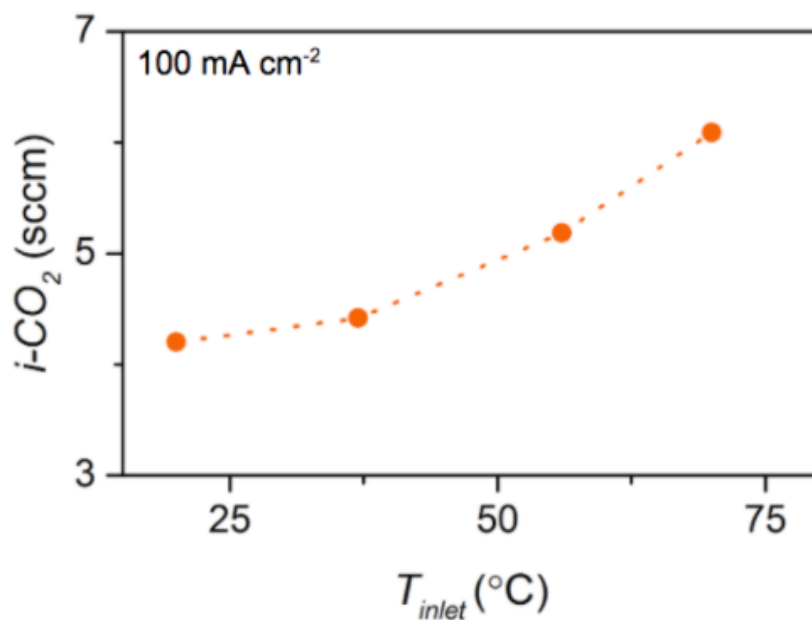

**Figure S9.**  $i\text{-CO}_2$  flow rates measured in the outlet stream of the reactor during operation at a constant current density of  $100 \text{ mA cm}^{-2}$  for the silver foam electrode at different temperatures.

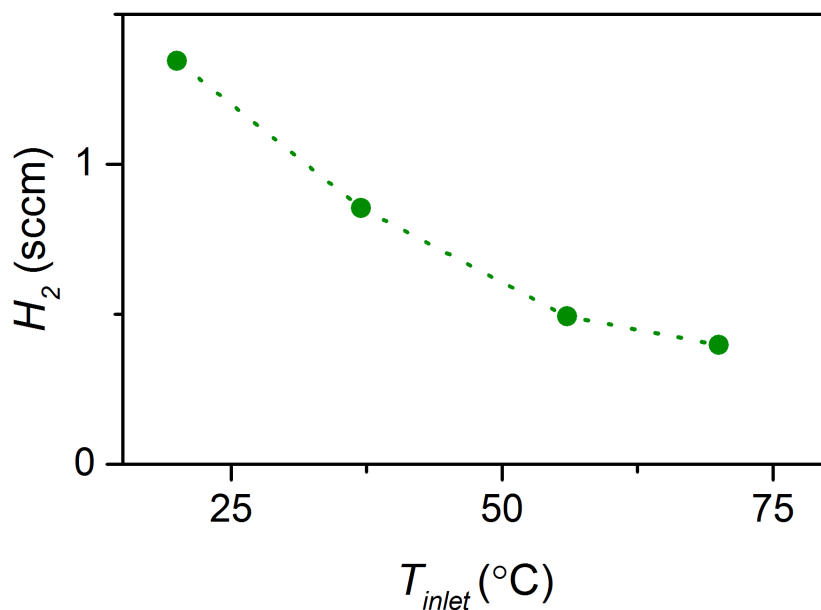

**Figure S10.**  $\text{H}_2$  flow rates measured in the outlet stream of the reactor during operation at a constant current density of  $100 \text{ mA cm}^{-2}$  for the silver foam electrode at different temperatures.

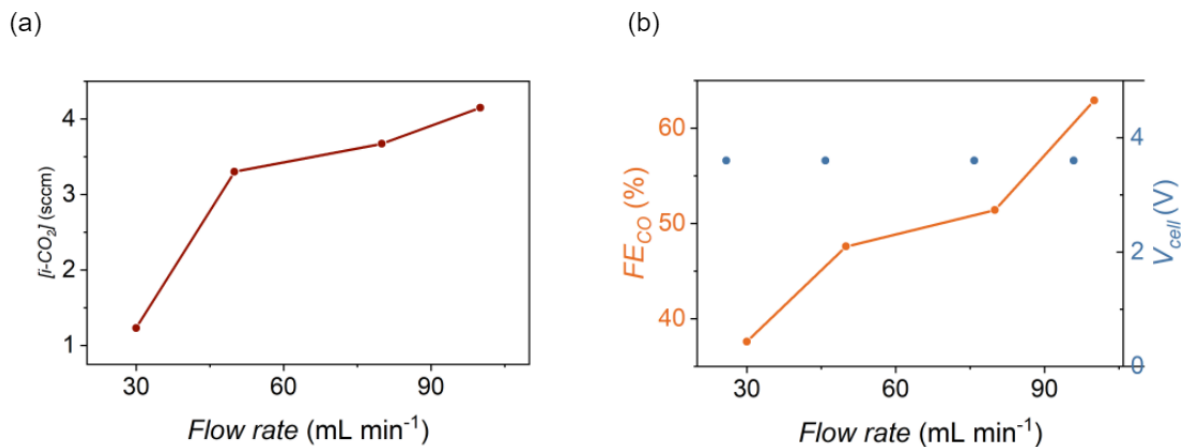

**Figure S11.** (a)  $i\text{-CO}_2$  flow rates and (b)  $\text{FE}_{\text{CO}}$  and  $V_{\text{cell}}$  as a function of flow rates measured in the reactor during operation at a constant current density of  $100 \text{ mA cm}^{-2}$  for the silver foam electrode at different bicarbonate flow rates.

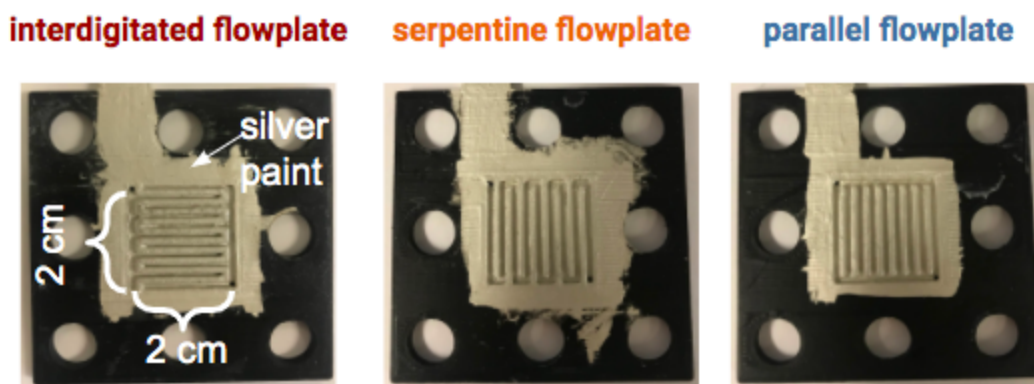

**Figure S12.** Photos of the 3D printed interdigitated, serpentine and parallel flow plates. Silver paint was used to make the flowplate conductive.

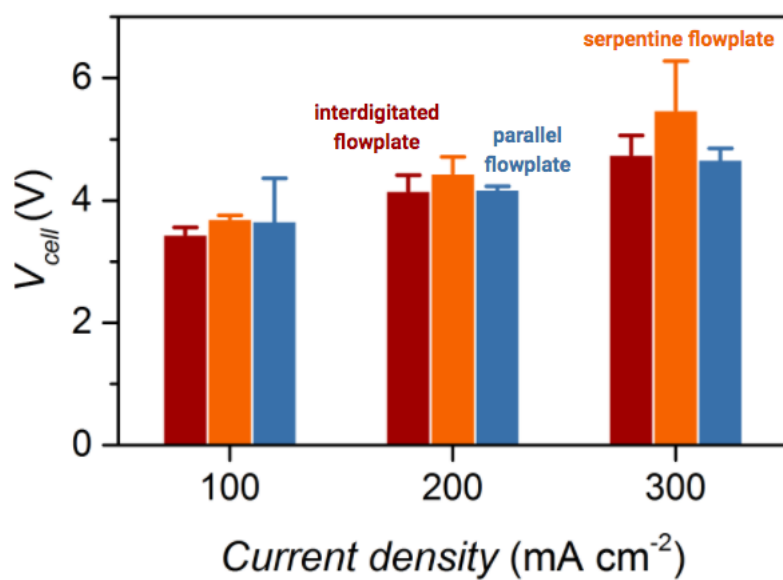

**Figure S13.** Cell voltages at varying current densities for the interdigitated, serpentine, and parallel flow patterns. Error bars denote the standard deviation of three replicated experiments.

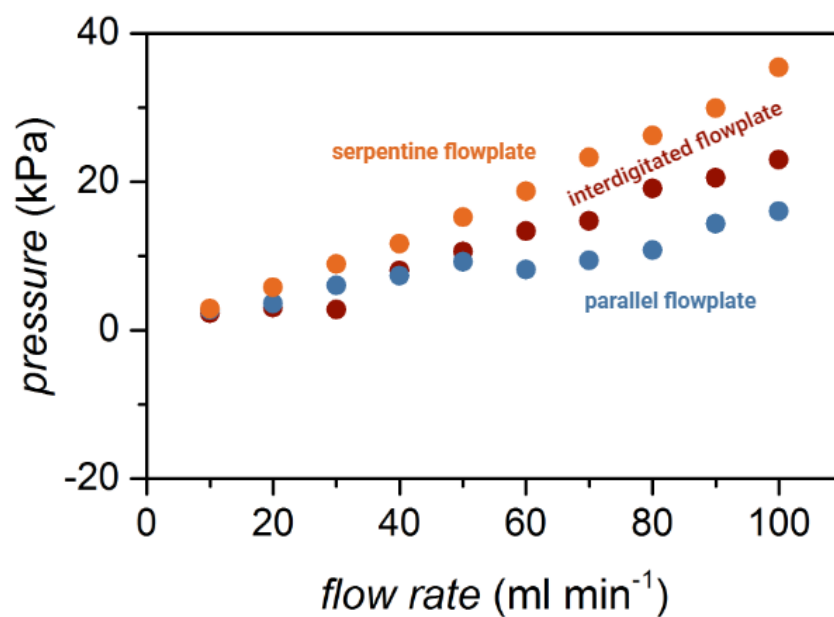

**Figure S14.** Comparison of inlet-to-outlet pressure drop for interdigitated, serpentine, and parallel flow pattern geometries.

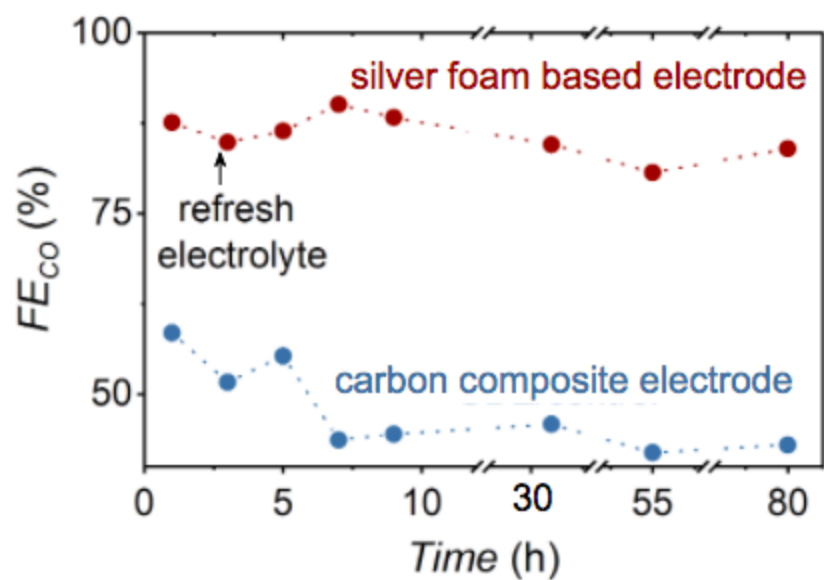

**Figure S15.**  $FE_{CO}$  at a constant applied current density of  $65 \text{ mA cm}^{-2}$  ( $20^\circ \text{C}$ , 1 atm) for 80 h for the silver foam and carbon composite electrodes.

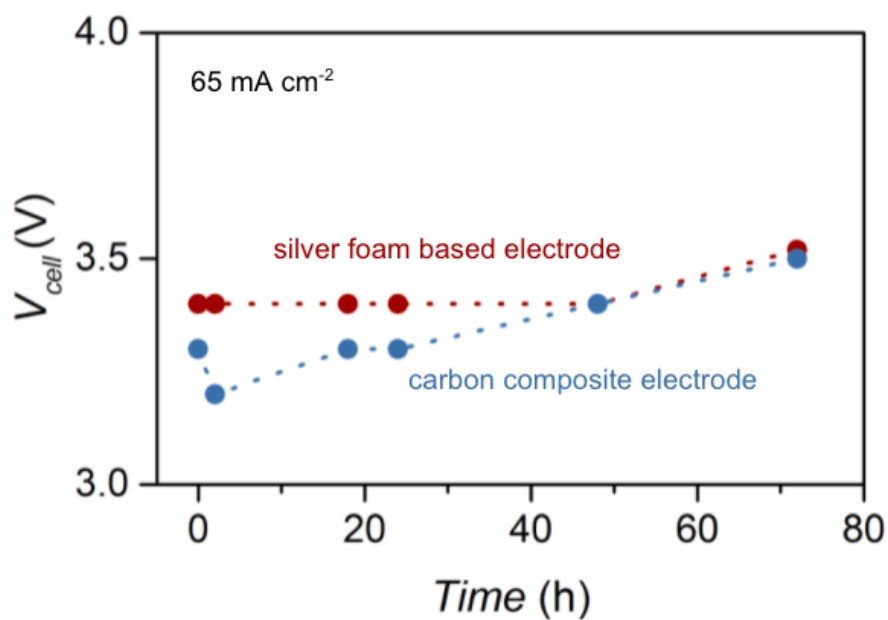

**Figure S16.**  $V_{cell}$  values measured during electrolyser stability tests at  $65 \text{ mA cm}^{-2}$  with the foam and carbon composite electrodes.

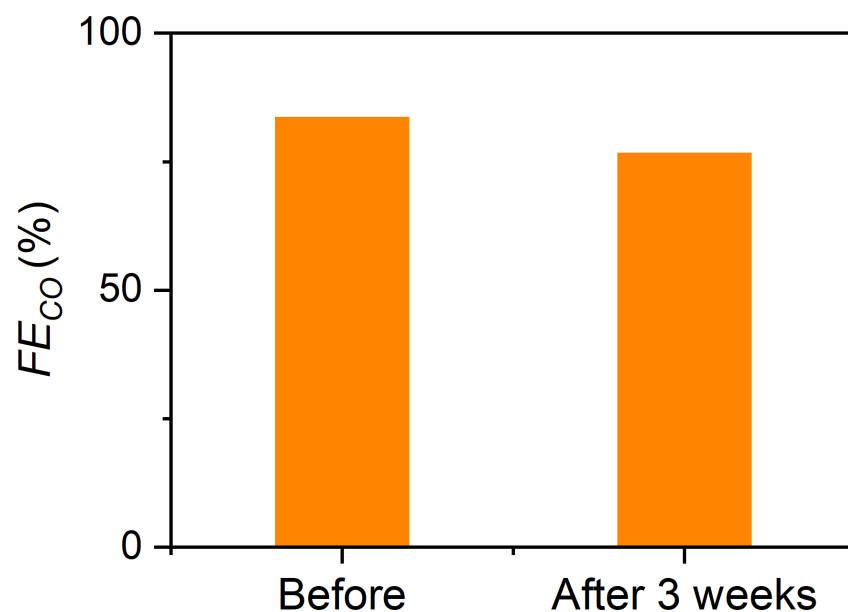

**Figure S17.** The silver foam electrode used for 80 h in the durability test was stored in air for 3 weeks, and  $FE_{CO}$  slightly decreased to 77% from 84% ( $65 \text{ mA cm}^{-2}$ ). The cell voltage was 3.8 V for the initial test and 3.6 V after 3 weeks.

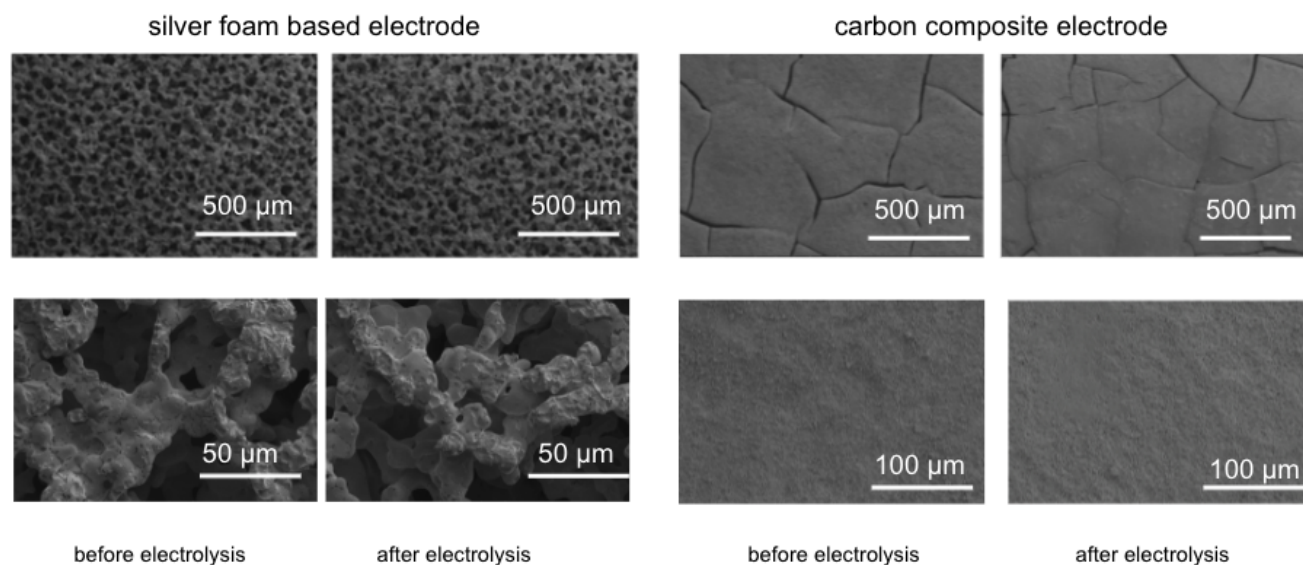

**Figure S18.** SEM images of the silver foam based electrode and carbon composite electrode taken before and after 80 h of electrolysis at  $65 \text{ mA cm}^{-2}$ .

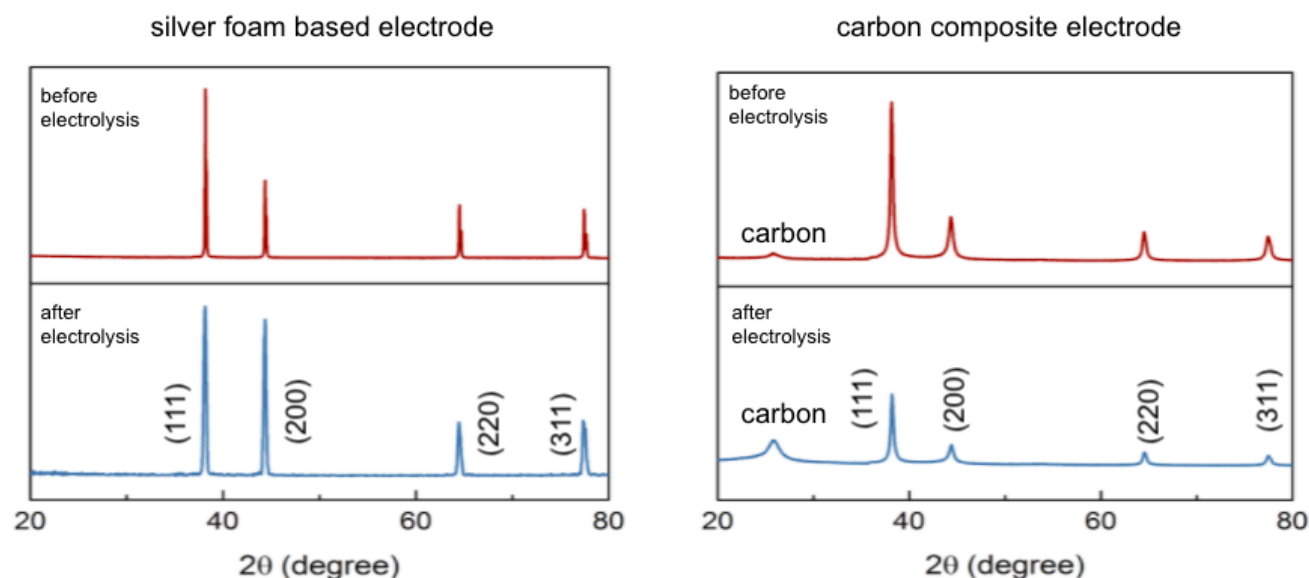

**Figure S19.** XRD spectra for the silver foam based electrode and carbon composite electrode before and after 80 h of electrolysis at  $65 \text{ mA cm}^{-2}$ .

## References

- 1 J. He, A. Huang, N. J. J. Johnson, K. E. Dettelbach, D. M. Weekes, Y. Cao and C. P. Berlinguette, *Inorg. Chem.*, 2018, **57**, 14624–14631.
- 2 J. Choi, J. Kim, P. Wagner, S. Gambhir, R. Jalili, S. Byun, S. Sayyar, Y. M. Lee, D. R. MacFarlane, G. G. Wallace and D. L. Officer, *Energy Environ. Sci.*, 2019, **12**, 747–755.
- 3 E. L. Clark, J. Resasco, A. Landers, J. Lin, L.-T. Chung, A. Walton, C. Hahn, T. F. Jaramillo and A. T. Bell, *ACS Catal.*, 2018, **8**, 6560–6570.
- 4 S. Oh, H. Kim, Y. Kwon, M. Kim, E. Cho and H. Kwon, *J. Mater. Chem. A Mater. Energy Sustain.*, 2016, **4**, 18272–18277.
- 5 D. A. Salvatore, D. M. Weekes, J. He, K. E. Dettelbach, Y. C. Li, T. E. Mallouk and C. P. Berlinguette, *ACS Energy Lett.*, 2018, **3**, 149–154.
- 6 H.-R. ‘molly’ Jhong, S. Ma and P. J. A. Kenis, *Curr. Opin. Chem. Eng.*, 2013, **2**, 191–199.
- 7 M. Liu, X.-A. Mao, C. Ye, H. Huang, J. K. Nicholson and J. C. Lindon, *J. Magn. Reson.*, 1998, **132**, 125–129.
- 8 L.-C. Weng, A. T. Bell and A. Z. Weber, *Phys. Chem. Chem. Phys.*, 2018, **20**, 16973–16984.
- 9 E. W. Lees, M. Goldman, A. G. Fink, D. J. Dvorak, D. A. Salvatore, Z. Zhang, N. W. X. Loo and C. P. Berlinguette, *ACS Energy Letters*, 2020, 2165–2173.
- 10 R. B. Kutz, Q. Chen, H. Yang, S. D. Sajjad, Z. Liu and I. Richard Masel, *Energy Technology*, 2017, **5**, 929–936.
- 11 Y. C. Li, D. Zhou, Z. Yan, R. H. Gonçalves, D. A. Salvatore, C. P. Berlinguette and T. E. Mallouk, *ACS Energy Lett.*, 2016, **1**, 1149–1153.
- 12 S. Ren, D. Joulié, D. Salvatore, K. Torbensen, M. Wang, M. Robert and C. P. Berlinguette, *Science*, 2019, **365**, 367–369.
- 13 S. Verma, Y. Hamasaki, C. Kim, W. Huang, S. Lu, H.-R. M. Jhong, A. A. Gewirth, T. Fujigaya, N. Nakashima and P. J. A. Kenis, *ACS Energy Lett.*, 2018, **3**, 193–198.
- 14 L. A. Diaz, N. Gao, B. Adhikari, T. E. Lister, E. J. Dufek and A. D. Wilson, *Green Chemistry*, 2018, **20**, 620–626.
- 15 E. J. Dufek, T. E. Lister, S. G. Stone and M. E. McIlwain, *Journal of The Electrochemical Society*, 2012, **159**, F514–F517.

- 16 C. Delacourt, P. L. Ridgway, J. B. Kerr and J. Newman, *Journal of The Electrochemical Society*, 2008, **155**, B42.
- 17 T. Li, E. W. Lees, M. Goldman, D. A. Salvatore, D. M. Weekes and C. P. Berlinguette, *Joule*, 2019, **3**, 1487–1497.
- 18 W. Zhao, K. Huang, Q. Zhang, H. Wu, L. Gu, K. Yao, Y. Shen and Y. Shao, *Nano Energy*, 2019, **58**, 69–77.
